# Supplementary material for: Post-Transcriptional Regulation of the Trypanosome Heat Shock Response by a Zinc Finger Protein
Source: PubMed Central journal article supplement (PMC3616968; doi:10.1371/journal.ppat.1003286), 2013-04-04
Supplement: ppat.1003286.s001.pdf [file ppat.1003286.s001.pdf]

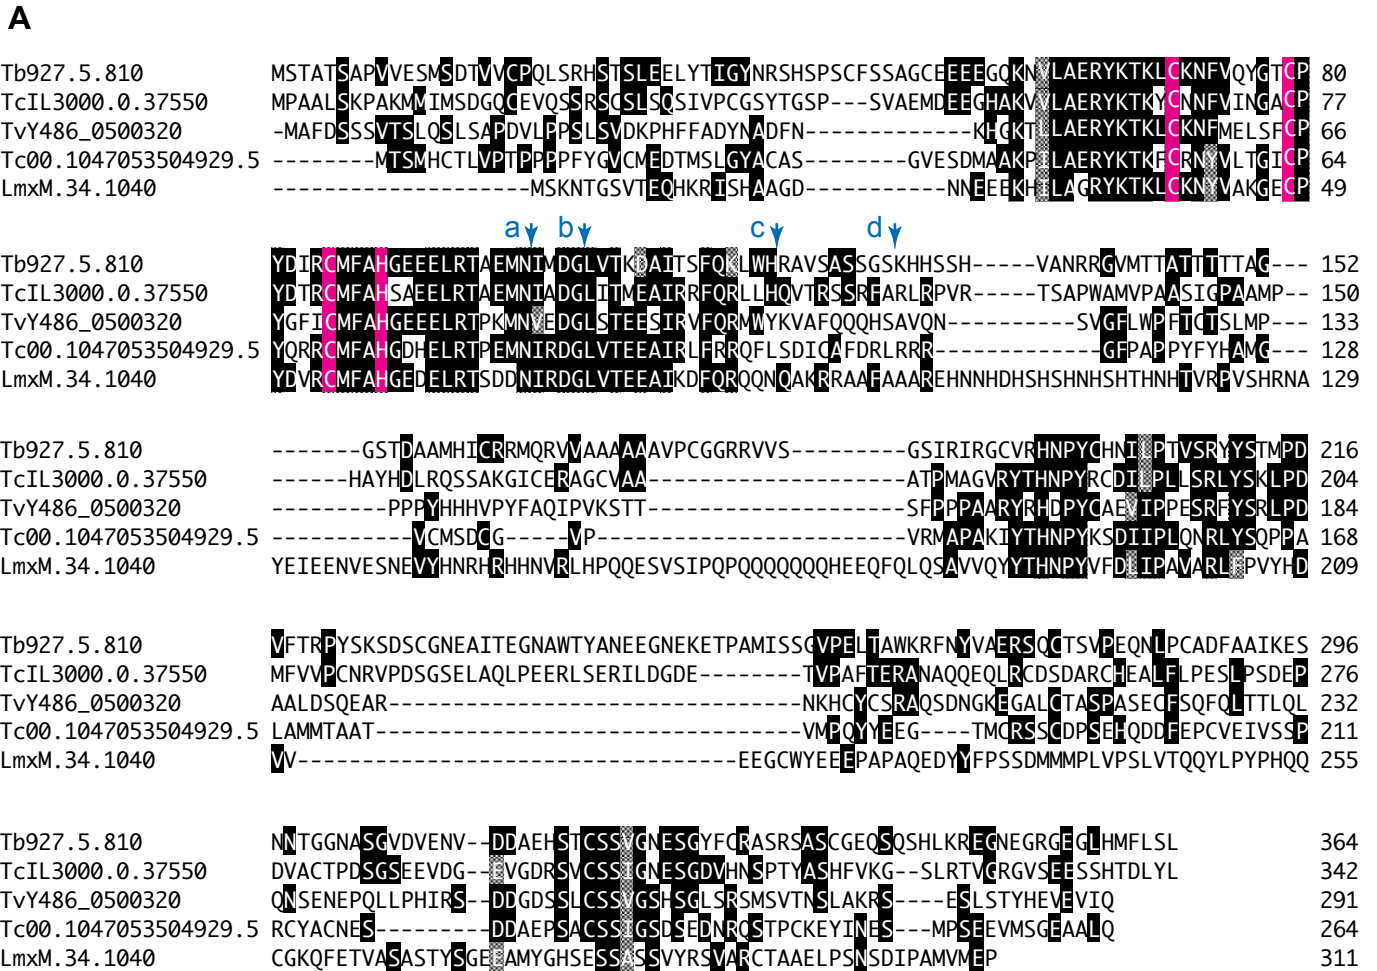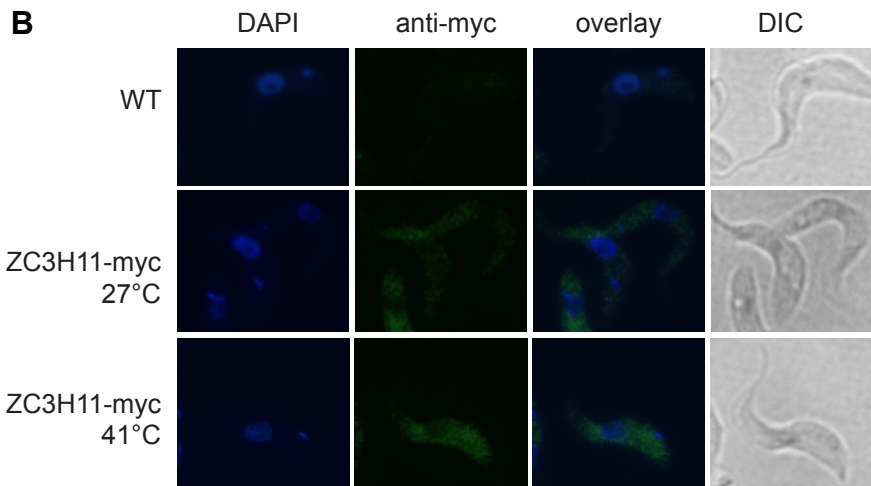

**Supplementary Figure S1**

A. Alignment of amino-acid sequences of selected Kinetoplastid ZC3H11s. The alignment was done using ClustalW (Slow, accurate, Gonnet), in the DNASTar package. Identical amino acids are shadowed in black and conserved amino acids in grey. Groups used were : (DE), (HKR), (AGILV), (NQ), (FWY), (ST), (P), (CM). The CCCH motif is in pink. The codes for conserved residues are listed at the bottom. Arrows indicate clone boundaries: a) N-terminus of the C-terminal fragment used in the tethering assay; b) C terminus of ZC3H11-104 used for RNA-binding assays; c) C terminus of ZC3H11-119 used for RNA-binding assays; d) C-terminus of the N-terminal fragment used in the tethering assay.

B. Location of ZC3H11-myc in procyclic forms. Results are shown for normal cells (not expressing myc-tagged protein) and cells expressing ZC3H11-myc grown at the normal temperature (27°C) or subjected to a one-hour heat shock at 41°C. DIC - differential interference contrast image.
