# Supplementary material for: Post-Transcriptional Regulation of the Trypanosome Heat Shock Response by a Zinc Finger Protein
Source: PubMed Central journal article supplement (PMC3616968; doi:10.1371/journal.ppat.1003286), 2013-04-04
Supplement: ppat.1003286.s005.pdf [file ppat.1003286.s005.pdf]

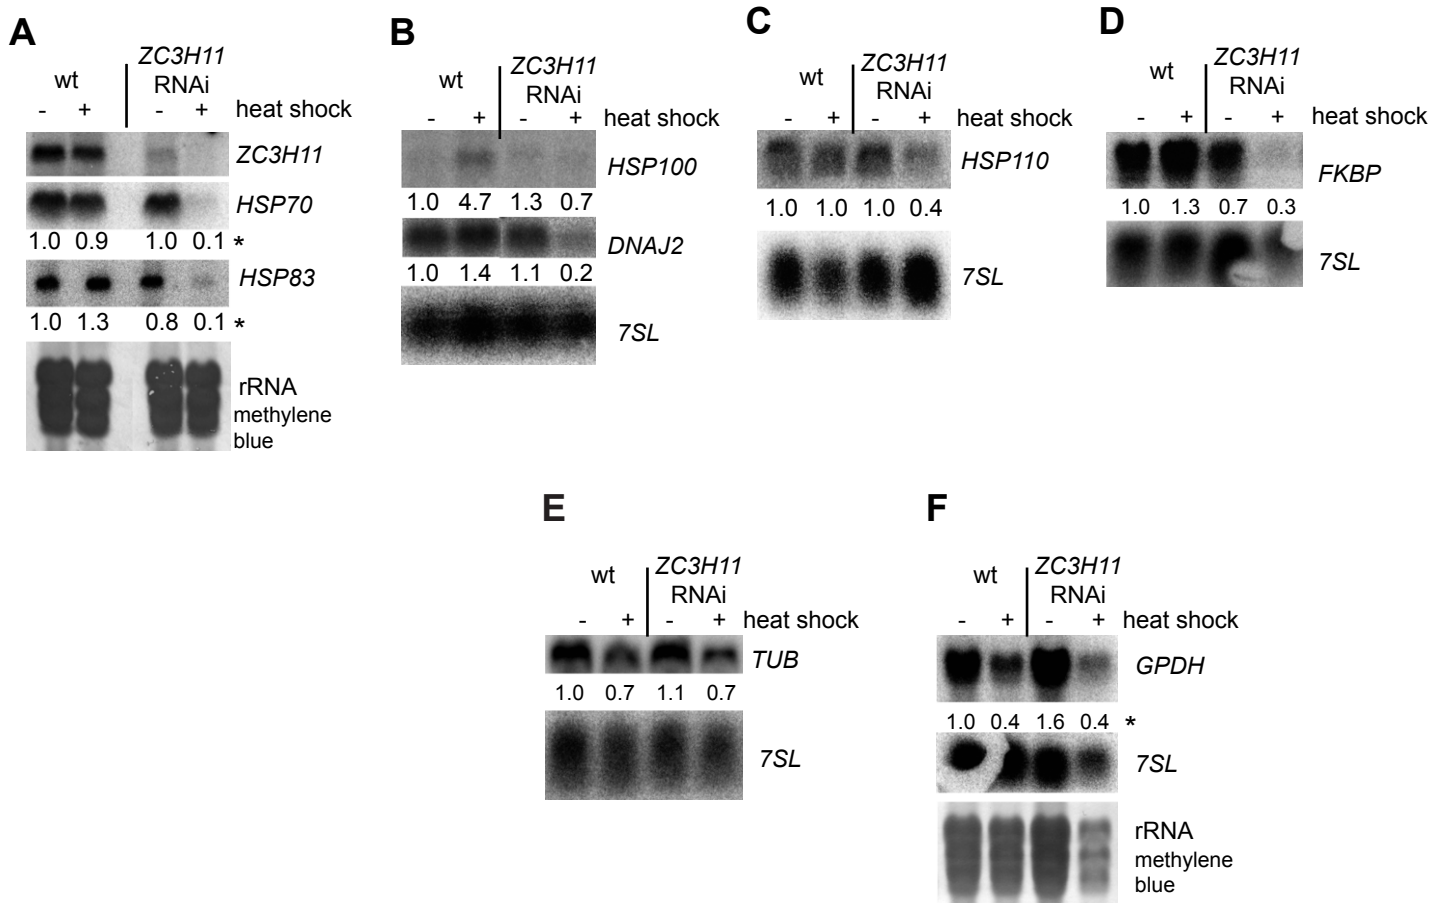

### Supplementary Figure S5

Effects of heat shock (1h, 41°C) on procyclic trypanosome mRNAs with or without *ZC3H11* RNAi. Various blots from different experiments are shown, with quantitation relative to rRNA (marked with \*) or the 7SL RNA.

A. *ZC3H11*, *HSP70* and *HSP83* mRNA levels from the same experiment were quantified relative to the rRNA (methylene blue staining).

B. *HSP100* (Tb927.2.5980) and *DNAJ2* (Tb927.2.5160)

C. *HSP110* (Tb927.10.12710)

D. *FKBP* (Tb927.10.16100)

E. Tubulin, *TUB*

F. Glycerol-3 phosphate dehydrogenase (*GPDH*, Tb927.8.3530). Due to a transfer problem at the 7SL signal, ribosomal RNA was used for normalization.
